# Supplementary material for: Mixed solvent exfoliated transition metal oxides nanosheets based flexible solid state supercapacitor devices endowed with high energy density
Source: Royal Society of Chemistry journal article supplement (doi:10.1039/c9nj03233a), 2019-01-01
Supplement: c9nj03233a1.pdf [file c9nj03233a1.pdf]

## Supporting Information

### **Mixed Solvent Exfoliated Transition Metal Oxides Nanosheets Based Flexible Solid State Supercapacitor Devices Endowed with High Energy Density**

Shibsankar Dutta<sup>a</sup>, Shreyasi Pal<sup>b</sup> and Sukanta De<sup>a\*</sup>

<sup>a</sup>Department of Physics, Presidency University, 86/1 College Street, Kolkata-700073, India

<sup>b</sup>Department of Physics, Raidighi College, South 24 Parganas, Diamond Harbour

Subdivision, Raidighi, West Bengal 743383, India

\*Corresponding Author

E-mail: [sukanta.physics@presiuniv.ac.in](mailto:sukanta.physics@presiuniv.ac.in)

#### **Hansen solubility parameter (HSP) Study**

The dissolution behavior can be explained by the Hansen solubility parameter (HSP) theory based on the three solubility parameters, these three dispersive ( $\delta_D$ ), polar ( $\delta_P$ ) and hydrogen bonding ( $\delta_H$ ) solubility parameters of solvent and solute are interrelated by the equation 1.

$$R_a = [4(\delta_{Dsolv} - \delta_{Dsolv})^2 + (\delta_{Psolv} - \delta_{Psolv})^2 + (\delta_{Hsolv} - \delta_{Hsolv})^2]^{\frac{1}{2}} \quad (1)$$

The solubility directly depends on the HSP distance ( $R_a$ ) value, smaller  $R_a$  value provides us higher solubility.

Mixed solvent exfoliation can also be explained by Hansen theory where the each of three parameters is linear function of the volume fraction of the composition [equation 2].<sup>1</sup>

$$\delta_{blend} = \sum \phi_{n,comp} \delta_{n,comp} \quad (2)$$

Where  $\phi$  defines the volume fraction of each composition. Based on these two equations different solvent mixture can be predicted for the nano materials exfoliation.

### HSP value for solvent and TMOs:

| Solvent          | $\delta_D$<br>(MPa <sup>1/2</sup> ) | $\delta_P$<br>(MPa <sup>1/2</sup> ) | $\delta_H$<br>(MPa <sup>1/2</sup> ) |
|------------------|-------------------------------------|-------------------------------------|-------------------------------------|
| Ethanol          | 15.8                                | 8.8                                 | 19.4                                |
| Water            | 18.1                                | 12.9                                | 15.5                                |
| MoO <sub>3</sub> | 16.6                                | 18.04                               | 10.23                               |
| MnO <sub>2</sub> | 16.94                               | 17.45                               | 10.84                               |
| RuO <sub>2</sub> | 16.94                               | 17.45                               | 10.84                               |

### 1. Supporting Figures

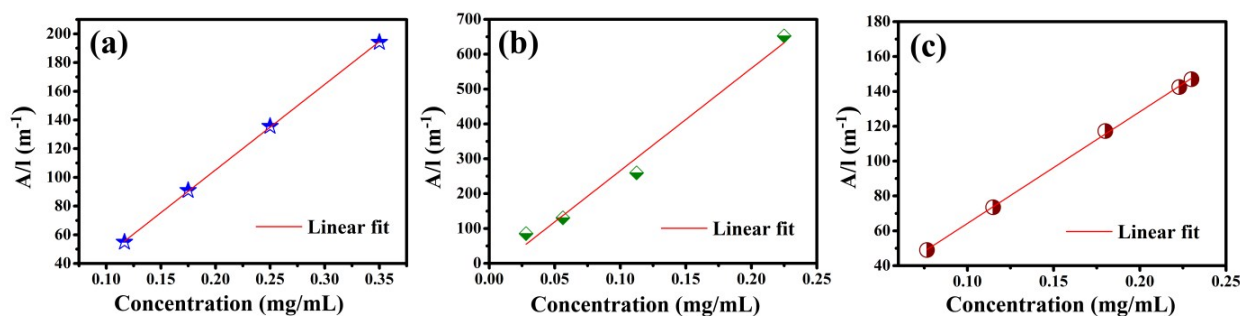

**Figure S1** † Absorbance per unit length (A/l) vs concentration (a) MoO<sub>3</sub>, (b) MnO<sub>2</sub>, (c) RuO<sub>2</sub>.

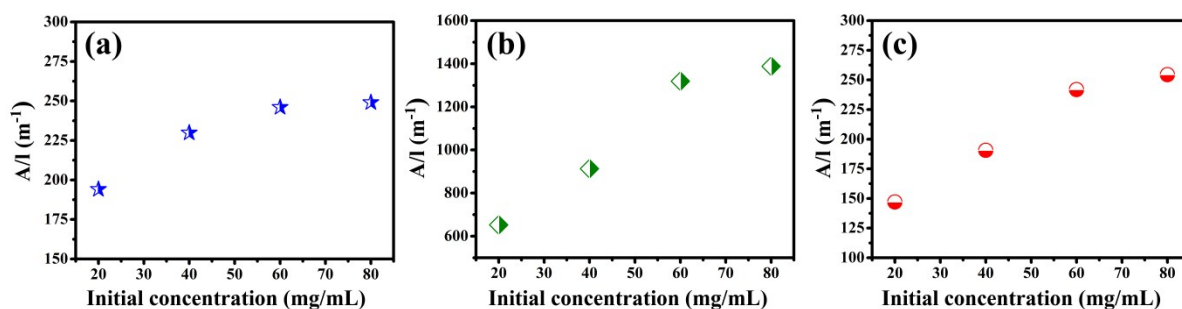

**Figure S2** † Absorbance per unit length (A/l) vs initial concentration (a) MoO<sub>3</sub>, (b) MnO<sub>2</sub>, (c) RuO<sub>2</sub>.

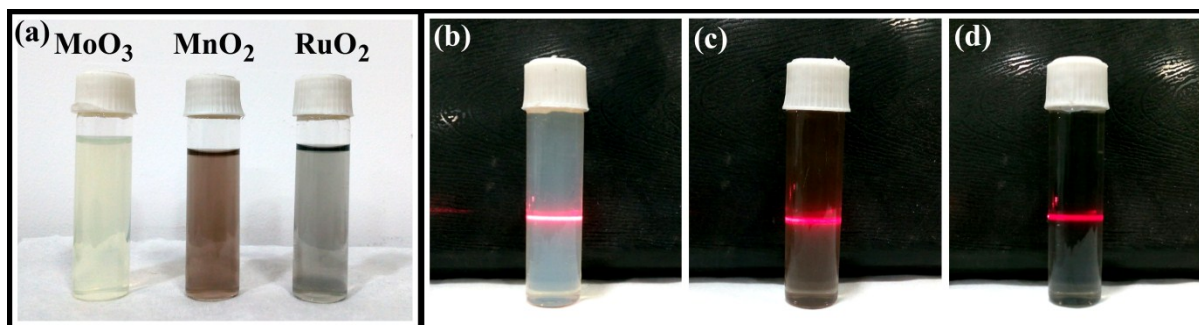

**Figure S3†** (a) Digital images of the MoO<sub>3</sub>, MnO<sub>2</sub> and RuO<sub>2</sub> nanosheets dispersion in Ethanol/ water, (b-d) Tyndall effect of the exfoliated MoO<sub>3</sub>, MnO<sub>2</sub> and RuO<sub>2</sub> nanosheets respectively.

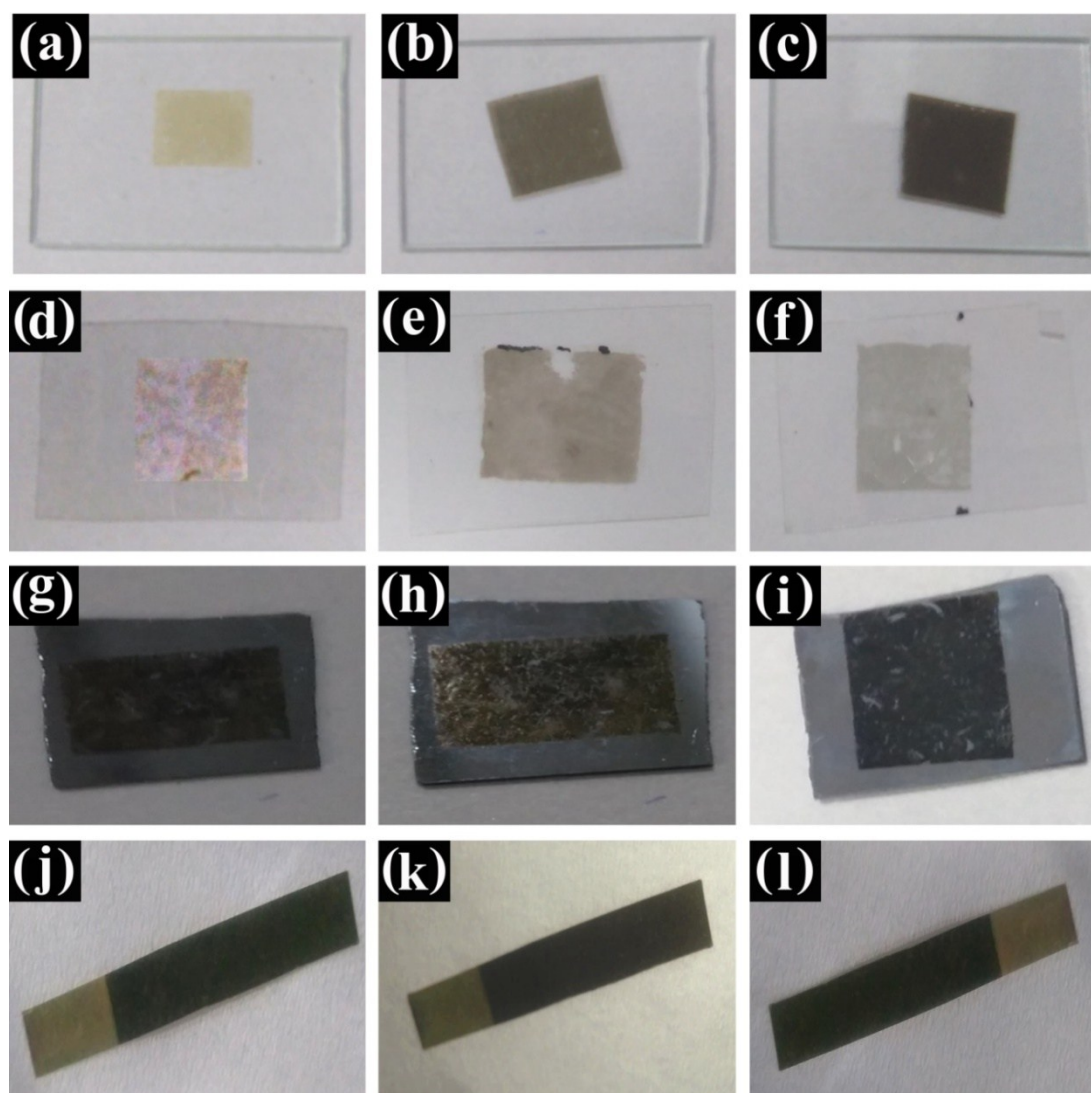

**Figure S4†** MoO<sub>3</sub>, MnO<sub>2</sub> and RuO<sub>2</sub> nanosheets thin films on (a-c) glass, (d-f) PET substrate respectively. MoO<sub>3</sub>/SWCNT, MnO<sub>2</sub>/SWCNT and RuO<sub>2</sub>/SWCNT nanocomposites thin films on (g-i) Si substrate and Au coated PET (j-l) substrate respectively.

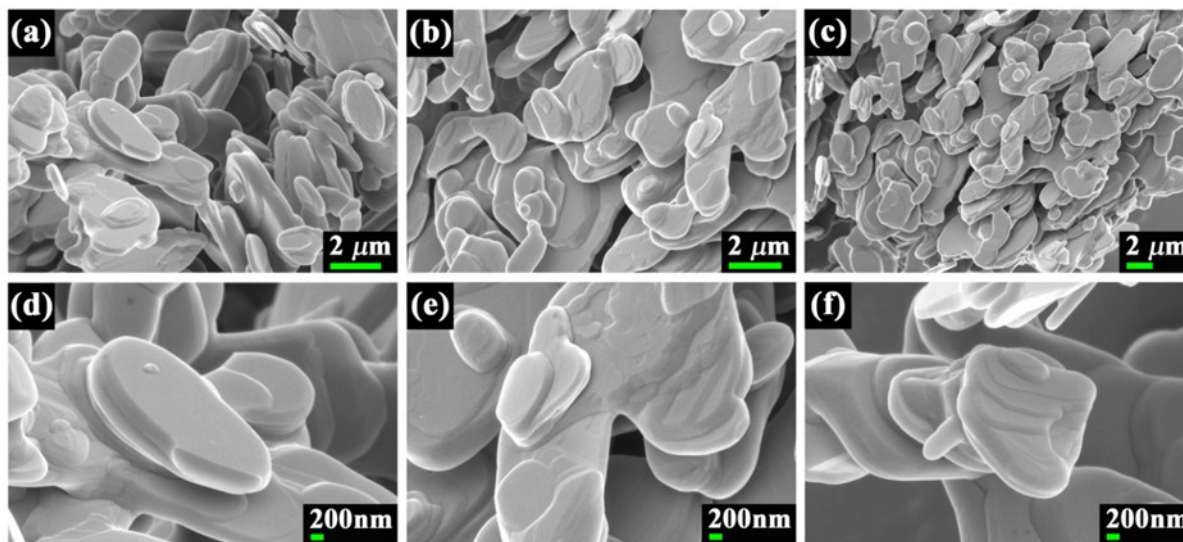

**Figure S5†** (a,b,c) FESEM images of the bulk MoO<sub>3</sub>, MnO<sub>2</sub>, RuO<sub>2</sub>; (d,e,f) showing their high magnification FESEM images respectively.

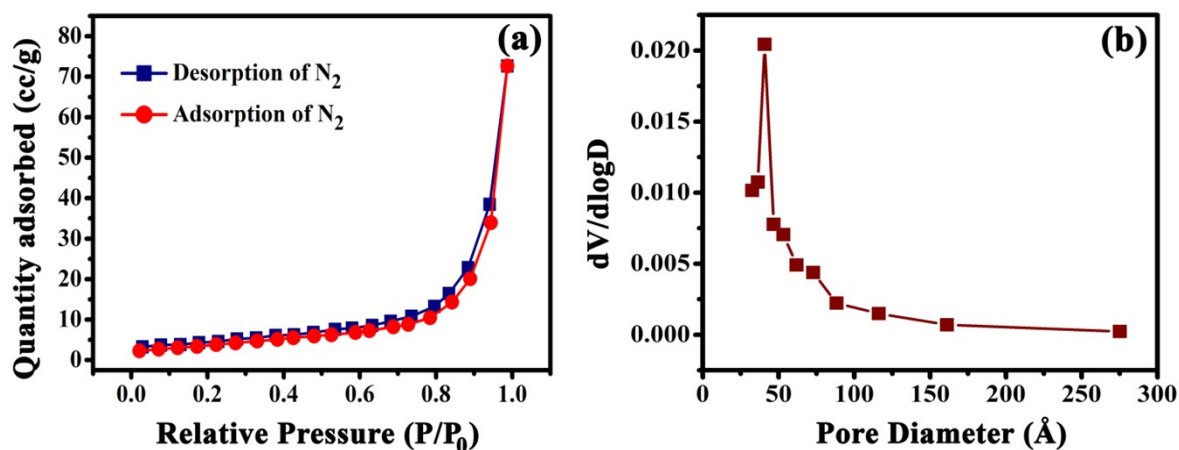

**Figure S6†** Nitrogen adsorption-desorption isotherm and corresponding pore size distribution curve of the pristine SWCNTs.

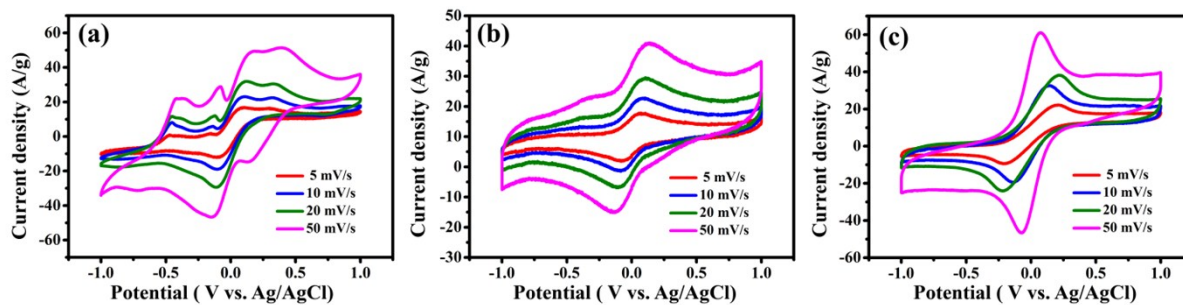

**Figure S7†** Cyclic voltammetry graph of (a) MoO<sub>3</sub>/SWCNT,(b) MnO<sub>2</sub>/SWCNT and (c) RuO<sub>2</sub>/SWCNT at different scan rates respectively using three electrode system.

## 2. Specific capacitance calculations:

In the case of two electrodes solid state supercapacitor the specific capacitance value was calculated using equation (3) and (4), where  $m_2$  was the total mass of the electrode materials,  $v$  (V/s) is the scan rate and  $\Delta t$  (sec) is the discharge time.<sup>2,3</sup> Energy density (E) and power density (P) can also be calculated from the equations (5) and (6).<sup>4</sup>

$$C = \frac{4 \int I_1 dV}{vm_2\Delta V} \dots\dots\dots(3)$$

$$C = \frac{4I_2 \Delta t}{m_2 \Delta V} \dots\dots\dots(4)$$

$$E = \frac{1}{8} C(\Delta V)^2 \dots\dots\dots (5)$$

$$P = \frac{1}{8} C \Delta V v \dots\dots\dots(6)$$

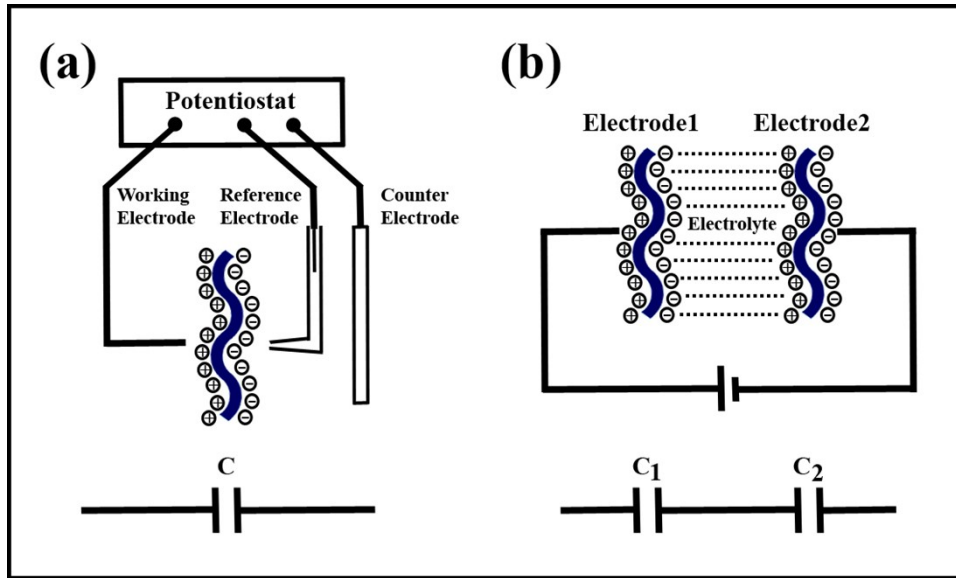

**Figure S8†** Schematic diagram and mechanism of the (a) three electrode and two electrode system.

Assuming the mass of the individual electrodes is  $m$ , the measured capacitance value for the two electrode system is:

$$C_{2E} = \frac{C}{2} \quad \text{Where, } C_1=C_2=C$$

Therefore the specific capacitance value is:

$$C_{\text{specific} - 2E} = \frac{C_{2E}}{2m} = \frac{C}{4m}$$

In the case of three electrode system:

$$C_{3E} = C$$

Therefore the specific capacitance value is

$$C_{\text{specific} - 3E} = \frac{C_{3E}}{m} = \frac{C}{m}$$

The relation between the calculated specific capacitance value in the two and three electrode system is



$$C_{\text{specific} - 3E} = 4 \times C_{\text{specific} - 2E}$$

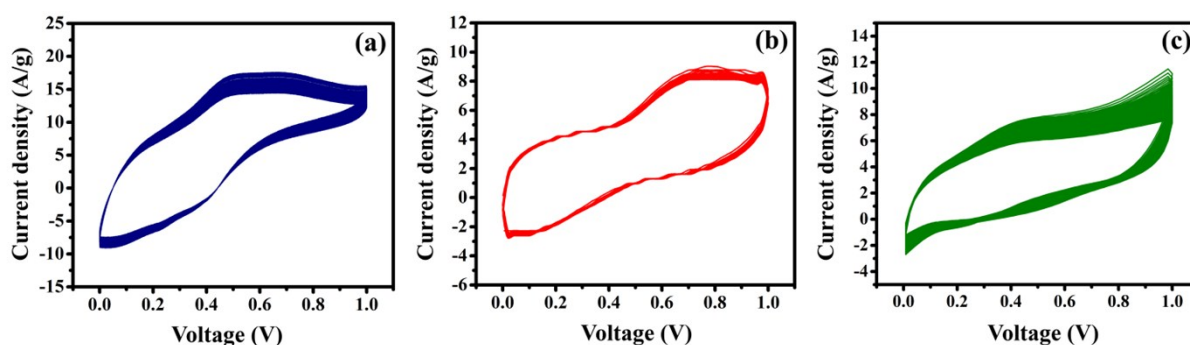

**Figure S9†** Cyclic voltammetry graph of (a) MoO<sub>3</sub>/SWCNT, (b) MnO<sub>2</sub>/SWCNT and (c) RuO<sub>2</sub>/SWCNT at 100 mV/s scan rates for 1000 cycles respectively using two electrode system.

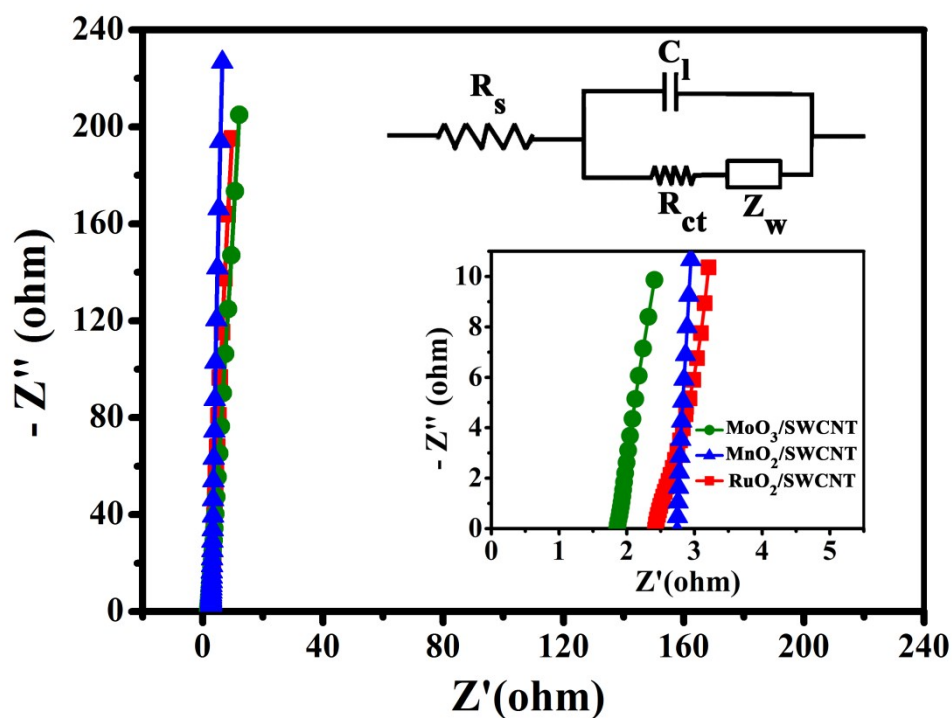

**Figure S10†** Nyquist plot of the all solid state supercapacitors; Inset showing the enlarge view of high frequency region and an equivalent circuit model.

### 3. The electrochemical behavior and charge discharge mechanism of the TMOs

According to the charge-storage mechanism the electrochemical reaction occurring at MoO<sub>3</sub>/SWCNT electrode is

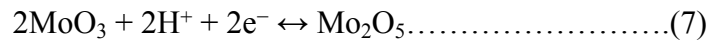

The charge-storage mechanism of MnO<sub>2</sub>/SWCNT electrode involves a reversible reduction/oxidation between Mn<sup>4+</sup> and Mn<sup>3+</sup>, which can be denoted as Eq. (8)

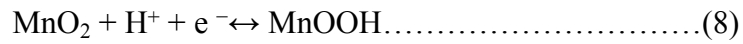

And the charge discharge mechanism of the RuO<sub>2</sub> can be explain by the reversible reactions given below

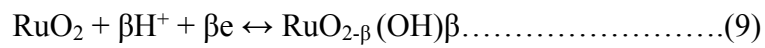



**Table S1. Comparison of the electrochemical performance of the TMOs/SWCNT supercapacitor with previously reported metal oxide supercapacitors.**

| Electrode materials                                       | Electrolyte                                           | Specific capacitance (F/g) | Energy density (Wh kg <sup>-1</sup> ) | Power density (kW kg <sup>-1</sup> ) | Ref.         |
|-----------------------------------------------------------|-------------------------------------------------------|----------------------------|---------------------------------------|--------------------------------------|--------------|
| graphene/MnO <sub>2</sub> // graphene/Ag                  | -                                                     | -                          | 7.53                                  | 90.3                                 | 5            |
| 3D Al@Ni@MnOx nanospike// CCG                             | Na <sub>2</sub> SO <sub>4</sub> /PVA                  | -                          | 23.02                                 | 0.947                                | 6            |
| MnO <sub>2</sub> @PANI// 3D graphene foam (GF)            | KOH/PVA                                               | 95.3                       | 37                                    | 0.386                                | 7            |
| Waste paper fibersRGO–MnO <sub>2</sub>                    | PVA/Na <sub>2</sub> SO <sub>4</sub>                   | 220                        | 19.6                                  | 2.4                                  | 8            |
| MnO <sub>2</sub> nanoflakes                               | PVP/LiClO <sub>4</sub>                                | -                          | 23                                    | 1.9                                  | 9            |
| SWCNTs//RuO <sub>2</sub>                                  | PVA/H <sub>3</sub> PO <sub>4</sub>                    | 138                        | 18.8                                  | 96                                   | 10           |
| Graphene(IL-CMG)//RuO <sub>2</sub> -IL-CMG                | PVA–H <sub>2</sub> SO <sub>4</sub>                    | 175                        | 19.7                                  | 6.8                                  | 11           |
| MnO <sub>2</sub> //Mesoporous CNT                         | Na <sub>2</sub> SO <sub>4</sub>                       | 85.8                       | 47.4                                  | 0.200                                | 12           |
| Graphene/MnO <sub>2</sub> //Graphene                      | Na <sub>2</sub> SO <sub>4</sub>                       | 31.0                       | 30.4                                  | 0.100                                | 13           |
| Graphene/MnO <sub>2</sub> //ACF                           | Na <sub>2</sub> SO <sub>4</sub>                       | 113.5                      | 51.1                                  | 0.198                                | 14           |
| Activated graphene/MO <sub>2</sub>                        | Na <sub>2</sub> SO <sub>4</sub>                       | 175                        | 32.3                                  | 21                                   | 15           |
| //Activated graphene                                      |                                                       |                            |                                       |                                      |              |
| Graphene/PANI//Graphene/RuO <sub>2</sub>                  | KOH                                                   | -                          | 26.3                                  | 0.150                                | 16           |
| TiO <sub>2</sub> //CNT                                    | LiPF <sub>6</sub>                                     | -                          | 12.5                                  | 0.300                                | 17           |
| Graphene/Ni(OH) <sub>2</sub>                              | KOH                                                   | -                          | 48.0                                  | 0.230                                | 18           |
| //Graphene/RuO <sub>2</sub>                               |                                                       |                            |                                       |                                      |              |
| Carbon spheres/MnO <sub>2</sub> //Carbon spheres          | Na <sub>2</sub> SO <sub>4</sub>                       | -                          | 22.1                                  | 0.100                                | 19           |
| CNT/MnO <sub>2</sub> //CNT/In <sub>2</sub> O <sub>3</sub> | Na <sub>2</sub> SO <sub>4</sub>                       | -                          | 25.0                                  | -                                    | 20           |
| Graphene/MnO <sub>2</sub>                                 | Na <sub>2</sub> SO <sub>4</sub>                       | 307                        | 42.6                                  | 0.276                                | 21           |
| //Graphene/MoO <sub>3</sub>                               |                                                       |                            |                                       |                                      |              |
| MoO <sub>3</sub> /SWCNT// MoO <sub>3</sub> /SWCNT         | PVA/H <sub>2</sub> SO <sub>4</sub>                    | 717                        | 24.89                                 | 1.61                                 | Present Work |
|                                                           | 1 M Na <sub>2</sub> SO <sub>4</sub> (Three electrode) | 1205.08                    | 669                                   | 21.69                                |              |
| MnO <sub>2</sub> /SWCNT// MnO <sub>2</sub> /SWCNT         | PVA/H <sub>2</sub> SO <sub>4</sub>                    | 540                        | 18.73                                 | 1.21                                 |              |
|                                                           | 1 M Na <sub>2</sub> SO <sub>4</sub> (Three electrode) | 1168.69                    | 649.27                                | 21.03                                |              |
| RuO <sub>2</sub> /SWCNT// RuO <sub>2</sub> /SWCNT         | PVA/H <sub>2</sub> SO <sub>4</sub>                    | 676                        | 23.48                                 | 1.52                                 |              |
|                                                           | 1 M Na <sub>2</sub> SO <sub>4</sub> (Three electrode) | 1308.45                    | 726.91                                | 23.55                                |              |

## Reference

1. K. G. Zhou, N. N. Mao, H. X Wang, Y. Peng and H. L. Zhang, *Angew. Chem. Int. Ed.*, 2011, **50**, 10839.
2. K. Zhou, W. Zhou, X. Liu, Y. Sang, S. Ji, W. Li, J. Lu, L. Li, W. Niu, H. Liu and S. Chen, *Nano Energy*, 2015, **12**, 510-520.
3. H. Wang, H. Yi, X. Chen and X. Wang, *J. Mater. Chem. A*, 2014, **2**, 3223-3230.
4. S.Ratha and C. S.Rout, *RSC Adv.*, 2015, **5**, 86551-86557.
5. Y. Shao, H. Wang, Q. Zhang and Y. Li, *J. Mater. Chem. C*, 2013, **1**, 1245-1251.
6. J. Yang, G. Li, Z. Pan, M. Liu, Y. Hou, Y. Xu, H. Deng, L. Sheng, X. Zhao, Y. Qiu and Y. Zhang, *ACS Appl. Mater. Interfaces*, 2015, **7**, 22172-22180.
7. K. Ghosh, C. Yue, M. Sk and R. Jena, *ACS Appl. Mater. Interfaces.*, 2017, **9**, 15350-15363.
8. H. Su, P. Zhu, L. Zhang, F. Zhou, G. Li, T. Li, Q. Wang, R. Sun and C. Wong, *J. Electroanal. Chem.*, 2017, **786**, 28-34.
9. P. Chen, H. Chen, J. Qiu and C. Zhou, *Nano Res.*, 2010, **3**, 594-603.
10. B. G. Choi, S. J. Chang, H. W. Kang, C. P. Park, H. J. Kim, W. H. Hong, S. Lee and Y. S. Huh, *Nanoscale*, 2012, **4**, 4983-4988.
11. J. Duay, E. Gillette, R. Liu and S. B. Lee, *Phys. Chem.*, 2012, **14**, 3329-3337.
12. H. Jiang, C. Li, T. Sun and J. Ma, *Nanoscale*, 2012, **4**, 807-812.
13. Z. S. Wu, W. D. Ren, W. Wang, F. Li, B. Liu and H. M. Cheng, *ACS Nano*, 2010, **4**, 5835-5842.
14. Z. Fan, J. Yan, T. Wei, L. Zhi, G. Ning, T. Li and F. Wei, *Adv. Funct. Mater.*, 2011, **21**, 2366-2375.

15. X. Zhao, L. Zhang, S. Murali, M. D. Stoller, Q. Zhang, Y. Zhu and R. S. Ruoff, *ACS Nano*, 2012, **6**, 5404-5412.
16. J. Zhang, J. Jiang, H. Li and X. S. Zhao, *Energy Environ. Sci.*, 2011, **4**, 4009-4015.
17. Q. Wang, Z. Wen and J. H. Li, *Adv. Funct. Mater.*, 2006, **16**, 2141-2146.
18. H. L. Wang, Y. Liang, T. Mirfakhrai, Z. Chen, H. S. Casalongue and H. J. Dai, *Nano Res.*, 2011, **4**, 729-736.
19. Z. Lei, J. Zhang and X. S. Zhao, *J. Mater. Chem.*, 2012, **22**, 153-160.
20. P. C. Chen, G. Shen, Y. Shi, H. Chen and X. Zhou, *ACS Nano*, 2010, **4**, 4403-4411.
21. J. Chang, M. Jin, F. Yao, T. H. Kim, V. T. Le, H. Yue, F. Gunes, B. Li, A. Ghosh, S. Xie, and Y. H. Lee, *Adv. Funct. Mater.*, 2013, **23**, 5074-5083.
